# Supplementary material for: Rapid High-Yield Transient Expression of Swine Hepatitis E ORF2 Capsid Proteins in Nicotiana benthamiana Plants and Production of Chimeric Hepatitis E Virus-Like Particles Bearing the M2e Influenza Epitope
Source: MDPI journal article supplement (doi:10.3390/plants9010029), 2019-12-24
Supplement: s1 [file s1]

Supplementary Materials:

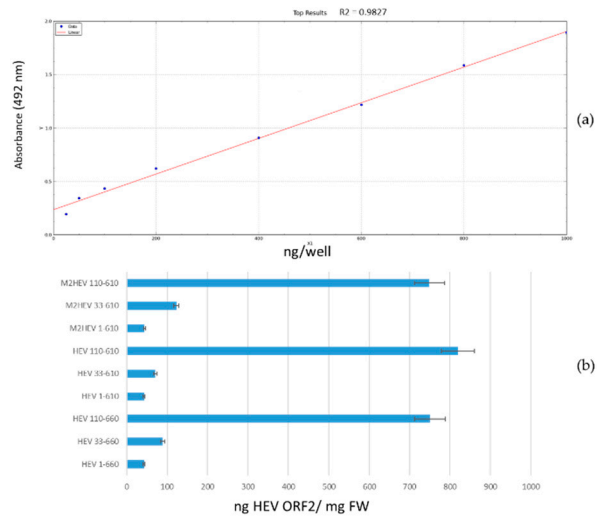

**Figure S1.** Capture ELISA for the HEV ORF2 protein quantification (a) Standard curve with purified rHEV ORF2 protein. The y-axis is the absorbance value. The x-axis is the value of rHEV ORF2 protein. (b) The expression level of chimeric M2 HEV and HEV ORF2 in TSP extracted from fresh plant leaves inoculated with the relevant constructs.

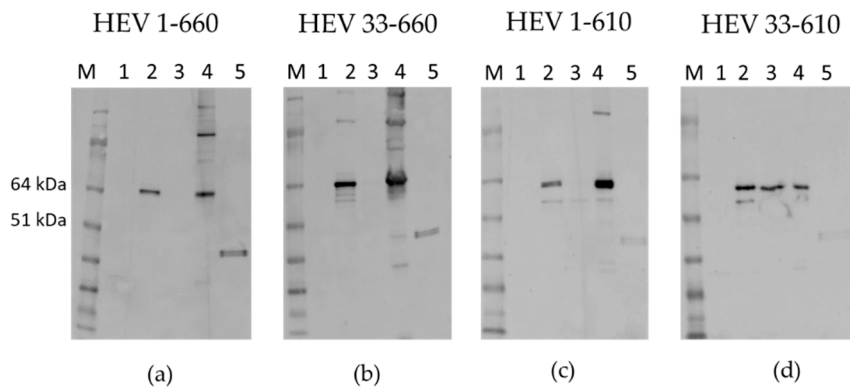

**Figure S2.** Western blot with anti-HEV ORF2 mAb of the constructs; (a) HEV 110-610; (b) HEV 33-660; (c) HEV 1-610; (d) HEV 33-610; M. Molecular weight marker (kDa); 1. pEAQ-*HT* empty vector; 2. Crude extract; 3. SN (soluble protein) after extraction in 3x volume and 13k rpm; 4. Pellet (insoluble part); 5. Positive control (HEV ORF2 452-617 aa recombinant protein).

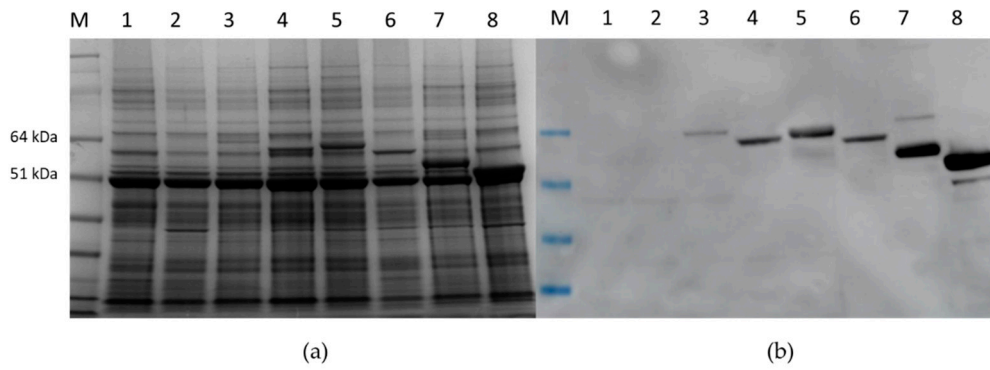

**Figure S3.** SDS-PAGE (a) and Western blot with anti-HEV ORF2 mAb (b) of TSP extracts (1 mg FW) of HEV chimeric constructs bearing M2e peptide and its relevant HEV construct without M2e; M. Molecular weight marker (kDa); 1. Healthy plant; 2. Empty pEAQ-HT; 3. M2 HEV 1-610; 4. HEV 1-610; 5. M2 HEV 33-610; 6. HEV 33-610; 7. M2 HEV 110-610; 8. HEV 110-610.

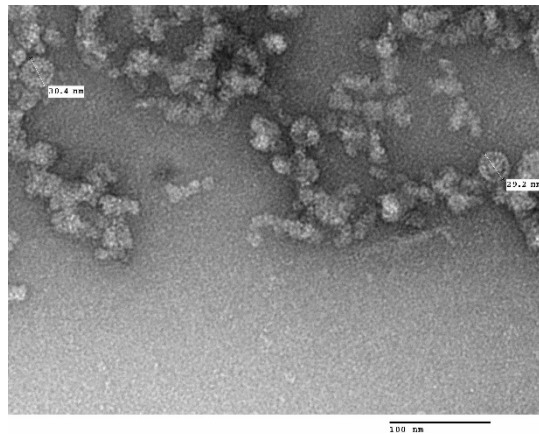

**Figure S4.** TEM of M2 HEV 110-610 sedimented fractions
